# Supplementary material for: Improved energy storage properties achieved in NaNbO3-based relaxor antiferroelectric ceramics via anti-parallel polar nanoregion design
Source: Royal Society of Chemistry journal article supplement (doi:10.1039/d4ta03546a), 2024-01-01
Supplement: d4ta03546a1.pdf [file d4ta03546a1.pdf]

## Supporting Information

### **Improved energy storage properties achieved in NaNbO<sub>3</sub>-based relaxor antiferroelectric ceramics via anti-parallel polar nanoregions design**

Zhentaο Wang <sup>a</sup>, Da Li <sup>a</sup>, Wenyuan Liu <sup>b</sup>, Xu Liang <sup>b</sup>, Weichen Zhao <sup>a</sup>, Jinnan Liu <sup>a</sup>, Jiajia Ren <sup>a</sup>, Tao Zhou <sup>d</sup>, Diming Xu <sup>a</sup>, Wenfeng Liu <sup>c</sup>, and Di Zhou <sup>a\*</sup>

<sup>a</sup> Electronic Materials Research Laboratory, Key Laboratory of the Ministry of Education & International Center for Dielectric Research, School of Electronic and Information Engineering, Xi'an Jiaotong University, Xi'an 710049, China

<sup>b</sup> State Key Laboratory for Strength and Vibration of Mechanical Structures, School of Aerospace Engineering, Xi'an Jiaotong University, Xi'an 710049, China

<sup>c</sup> State Key Laboratory of Electrical Insulation and Power Equipment, Xi'an Jiaotong University, Xi'an 710049, China

<sup>d</sup> School of Electronic and Information Engineering, Hangzhou Dianzi University, Hangzhou 310018, China

---

\* Corresponding author: Di Zhou; E-mail address: zhoudi1220@xjtu.edu.cn;

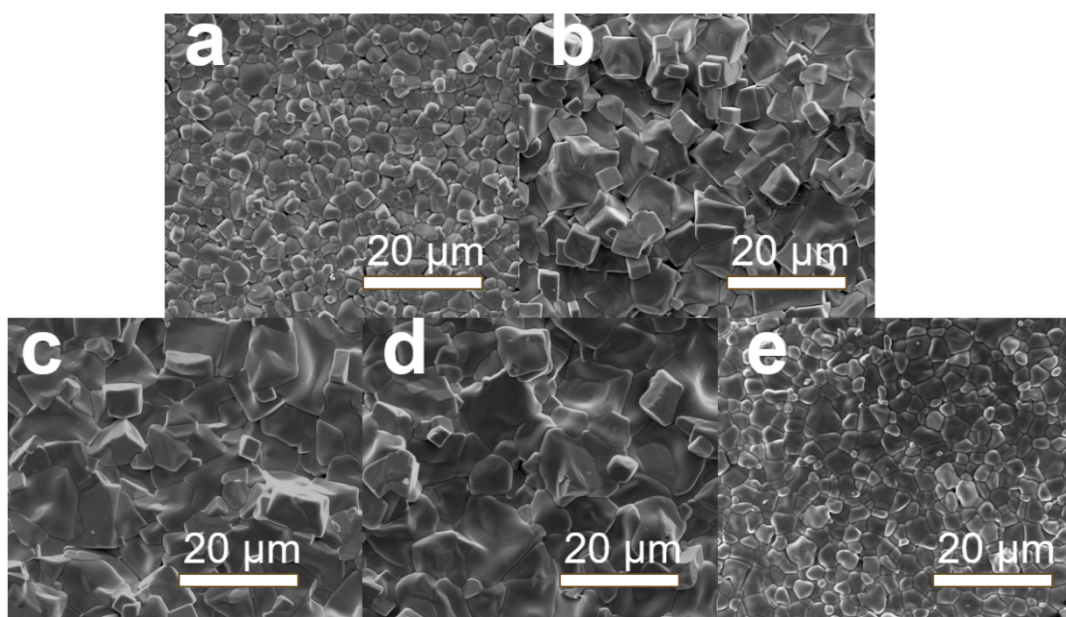

Fig. S1 SEM micrographs of NN-BZH ceramics. a)  $x = 0.05$ , b)  $x = 0.10$ , c)  $x = 0.15$ , d)  $x = 0.20$ , e)  $x = 0.15$  (RRP).

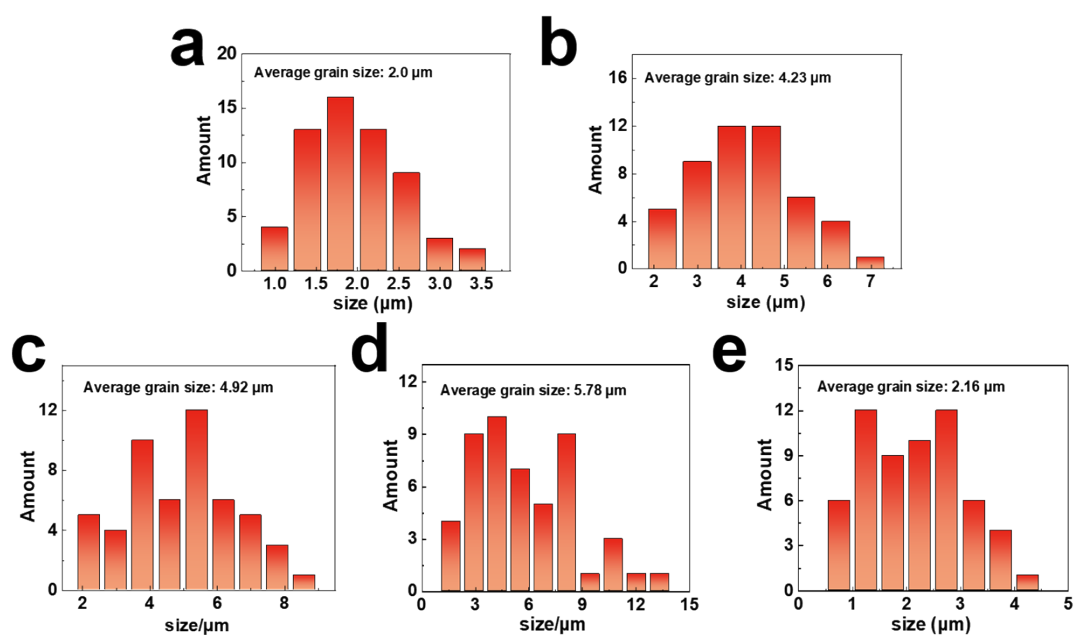

Fig. S2 The distribution of grain size of NN-BZH ceramics. a)  $x = 0.05$ , b)  $x = 0.10$ , c)  $x = 0.15$ , d)  $x = 0.20$ , e)  $x = 0.15$  (RRP).

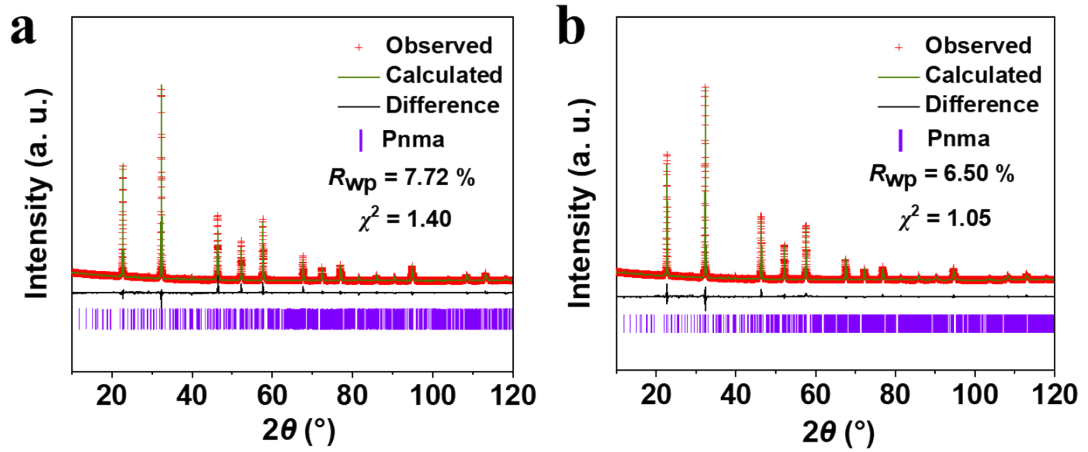

Fig. S3 The Rietveld refinement of XRD data for the a)  $x = 0.10$ , b)  $x = 0.20$  ceramics.

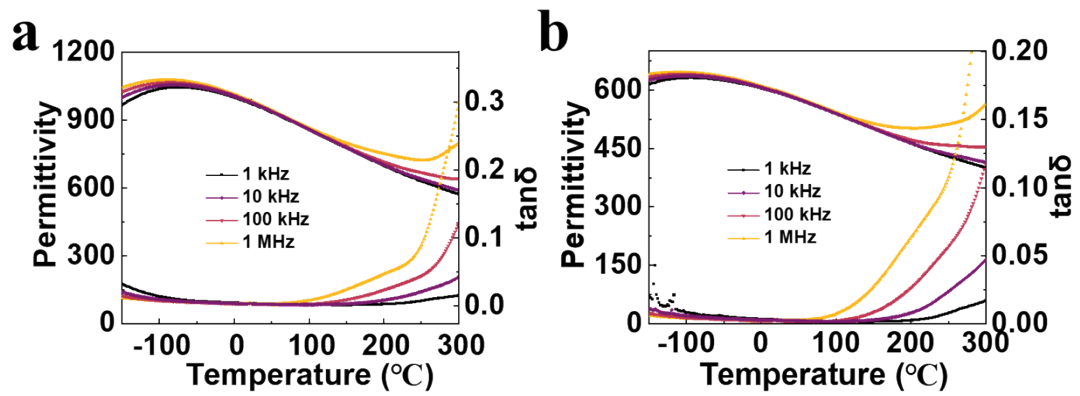

Fig. S4 Permittivity and dielectric loss as a function of temperature at various frequencies for a)  $x = 0.10$ , b)  $x = 0.20$  ceramics.

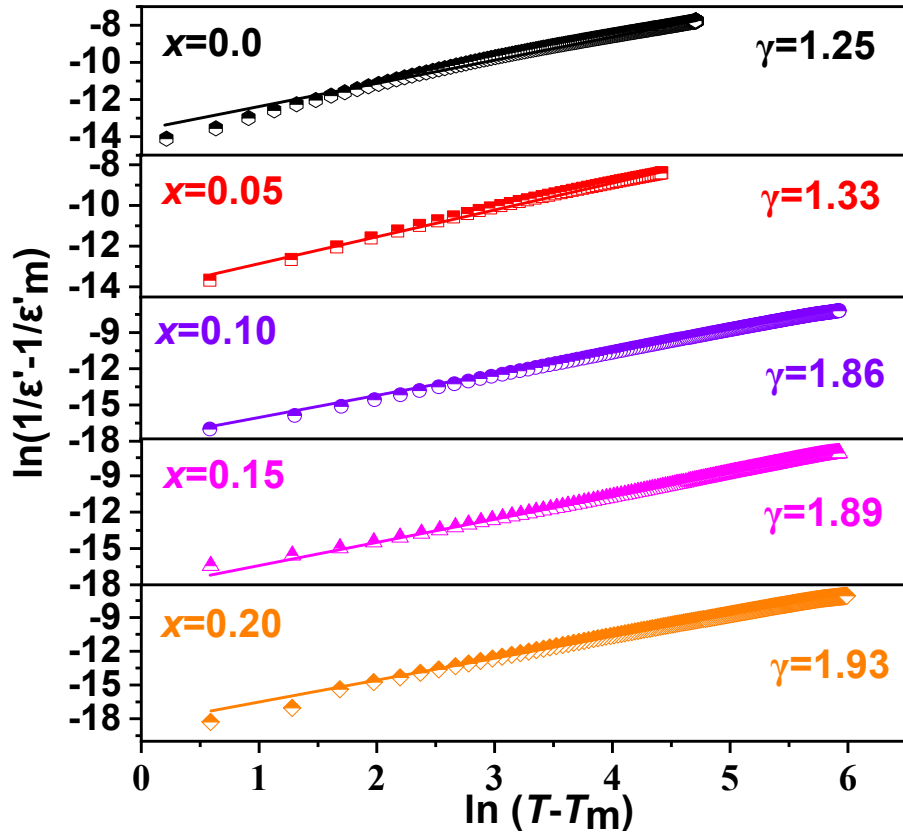

Fig. S5  $\ln(1/\epsilon' - 1/\epsilon'_m)$  versus  $\ln(T - T_m)$  for  $(1-x)\text{NN}-x\text{BZH}$  ceramics.

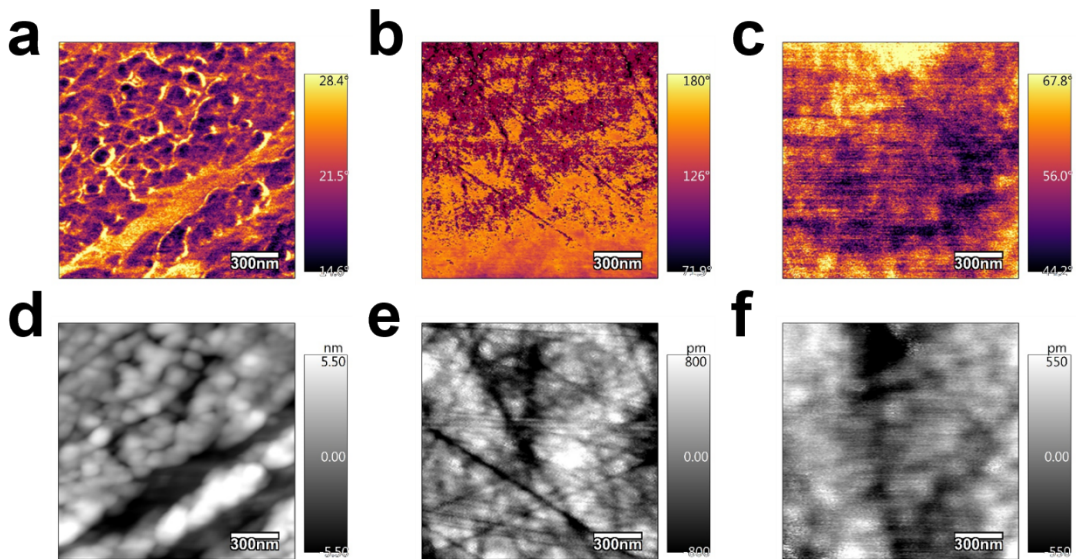

Fig. S6 Out-of-plane PFM phase and topography images of a) and d) NN, b) and e)  $x = 0.05$ , c) and f)  $x = 0.15$ .

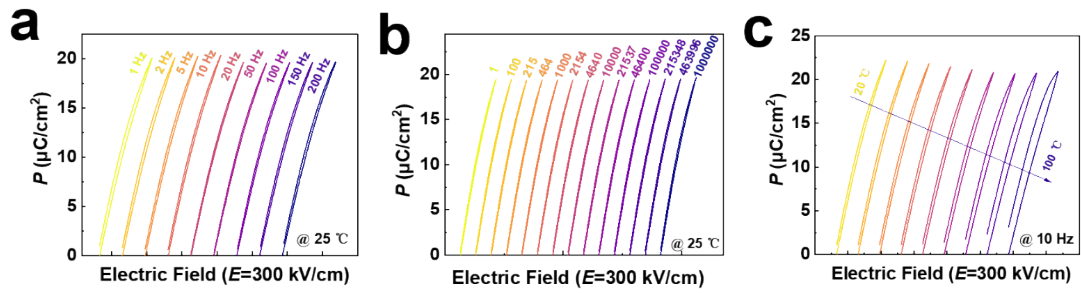

Fig. S7 a) Frequency-dependence (1-200 Hz), b) cycle-dependence (1- $10^6$ ) and (c) temperature-dependence (20–100 °C)  $P$ - $E$  hysteresis loop for  $x = 0.15$  (RRP) ceramics under 300 kV/cm.

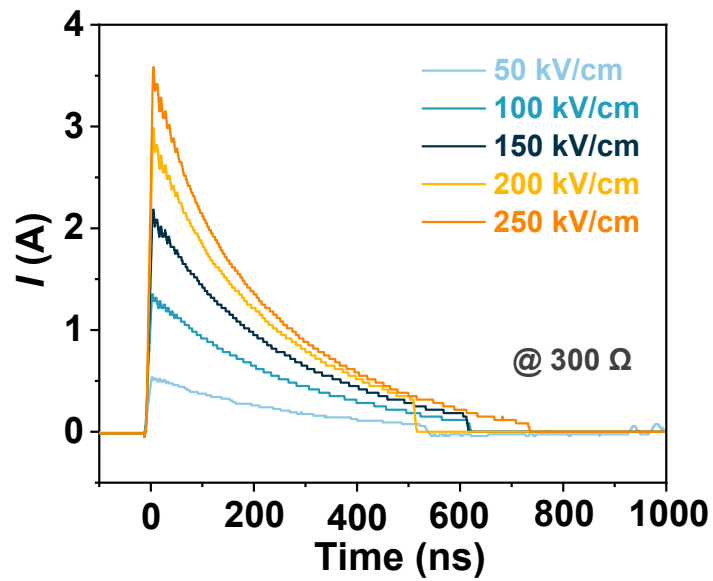

Fig. S8 Over-damped discharging waveforms of discharge energy density at various electric field for  $x = 0.15$  (RRP).
